# Supplementary material
Source: PubMed Central journal article supplement (PMC187845)
Supplement: pnas_100_17_9797__2.pdf [file pnas_100_17_9797__2.pdf]

**Table 4. Proteins locating to nucleocapsids and unknown localization**

| ORF                                     | Identity       | Library screen | SDS-PAGE - MALDI                                                                                                                                                                                                                                                          | MUDPIT MS/MS                                                                                                                                                                                                                                                                                                                                                                                                                                                                                                                                                                                                                                                           | Western blot | Ref. |
|-----------------------------------------|----------------|----------------|---------------------------------------------------------------------------------------------------------------------------------------------------------------------------------------------------------------------------------------------------------------------------|------------------------------------------------------------------------------------------------------------------------------------------------------------------------------------------------------------------------------------------------------------------------------------------------------------------------------------------------------------------------------------------------------------------------------------------------------------------------------------------------------------------------------------------------------------------------------------------------------------------------------------------------------------------------|--------------|------|
| Identified by using multiple techniques |                |                |                                                                                                                                                                                                                                                                           |                                                                                                                                                                                                                                                                                                                                                                                                                                                                                                                                                                                                                                                                        |              |      |
| 9                                       | p78/83         |                |                                                                                                                                                                                                                                                                           | MTNRRYESVQSYLFNRRNNKID<br>AHQFFERVDTAEAQIIKNNIYDN<br>TVVLNRDVLNLIKLANDVFDN<br>KAYMYVDDSEVSRHYNAVVK<br>MKRLVIGVRDPSLRQSLYNTIAY<br>IERLLNIGTVNDSEITMLIADFYD<br>LYSNYNIELPPPQALPRRRPSV<br>VQPAAPAPVPTIVREQTKPEQIIP<br>AAPPPPPSPVPNIPAPPPPPPSMS<br>ELPPAPPMPTEPQPAAPLDDRQQ<br>LLEAIRNEKNRTRLRPVKPKTAP<br><u>ETSTIVEVPTVLPKETFEKPPSA</u><br>SPPPPPPPPPPAPPAPPPMVDLSS<br>APPPPPLVDLPSEMLPPPAPSLSN<br><u>VLSELKSGTVRLKPAQKRPQSEII</u><br><u>PKSSTNLIADVLADTINRRRVA</u><br>MAKSSSEATSNDEGWDDDDNR<br>PNKANTPDVKYVQALFNVTSS<br>QLYTNSDERNTKAHNILNDVE<br>PLLQNKTQTNIDKARLLQDLAS<br>FVALSENPLDSPAIGSEKQPLFET<br>NRNLFYKSIEDLIFKFRYKDAEN<br>HLIFALTYHPKDYKFNELLYV<br>QQLSVNQQRTESSA |              | 1    |
| 49                                      | PCNA           |                |                                                                                                                                                                                                                                                                           |                                                                                                                                                                                                                                                                                                                                                                                                                                                                                                                                                                                                                                                                        |              | 2    |
| 54                                      | vp1054         |                |                                                                                                                                                                                                                                                                           |                                                                                                                                                                                                                                                                                                                                                                                                                                                                                                                                                                                                                                                                        |              | 3    |
| 61                                      | FP25K          |                | <u>MDOFEQLINVSLLKSLIKTQ</u><br>IDENVSDNIKSMSEKLKRL<br>EYDNLTDSEIYGIHDSRL<br>NNKKIRNYLKKICALLDL<br>NFKHVISSFKNHIVAKL<br>CDATRAKEWQTKSRERRL<br>KNFNLNINYDGPVKIFVAA<br>TAEQKLLKTRDALLPFY<br>KYISICKNGVMVRR <u>DEKSR</u><br>VFIVKNEQNIYKANKYY<br>AFHSDSVDNFESENDSEKM<br>LQNLI |                                                                                                                                                                                                                                                                                                                                                                                                                                                                                                                                                                                                                                                                        |              | 4    |
| 65                                      | DNA polymerase |                | MKIYPYNELKTRFAEYAKP<br>GEFNITSADTFRIIRL <u>LHYDE</u>                                                                                                                                                                                                                      | MKIYPYNELKTRFAEYAKPGEF<br>NITSADTFRIIRLHYDEKQGCLFA                                                                                                                                                                                                                                                                                                                                                                                                                                                                                                                                                                                                                     |              |      |

| ORF | Identity | Library screen | SDS-PAGE - MALDI                                                                                                                                                                                                                                                                                                                                                                                                                                                                                                                                                                                                                                                                                                                                                                                                                                                                                                                                                                                                                                                                                                                                                                                                    | MUDPIT MS/MS                                                                                                                                                                                                                                                                                                                                                                                                                                                                                                                                                                                                                                                                                                                                                                                                                                                                                                                                                                                                                                                                                                                                                                           | Western blot | Ref. |
|-----|----------|----------------|---------------------------------------------------------------------------------------------------------------------------------------------------------------------------------------------------------------------------------------------------------------------------------------------------------------------------------------------------------------------------------------------------------------------------------------------------------------------------------------------------------------------------------------------------------------------------------------------------------------------------------------------------------------------------------------------------------------------------------------------------------------------------------------------------------------------------------------------------------------------------------------------------------------------------------------------------------------------------------------------------------------------------------------------------------------------------------------------------------------------------------------------------------------------------------------------------------------------|----------------------------------------------------------------------------------------------------------------------------------------------------------------------------------------------------------------------------------------------------------------------------------------------------------------------------------------------------------------------------------------------------------------------------------------------------------------------------------------------------------------------------------------------------------------------------------------------------------------------------------------------------------------------------------------------------------------------------------------------------------------------------------------------------------------------------------------------------------------------------------------------------------------------------------------------------------------------------------------------------------------------------------------------------------------------------------------------------------------------------------------------------------------------------------------|--------------|------|
|     |          |                | <u>K</u> QGCLFAFCNTNIKERVLQ<br>FYFKVKLNLYSYKQCYDK<br><u>HIFPSCRNK</u> CISYTTFVAPG<br>VEGNYLNKINVIKIERNK <u>A</u><br><u>APSDNAACLDK</u> FLHNVR<br>VHMQTPFVEGAYMRFKKT<br>QRCQNNYVGGSTTRMFNL<br>QHFNEDEFELVDEMTLTSGI<br>MPVLSYDIETHSDGHNMS<br>KASVDCIMSIGFVVYKNDE<br>YAKFCFMYHKLPTQIPETY<br>DDDTYVVMFQNEIDMITAF<br>FDMIKITNPDVILDFNGDVF<br>DLPYILGRLNKTMLLK <u>R</u> <u>Y</u><br><u>DL</u> PAAAPT <u>TK</u> L <u>F</u> IN <u>KL</u> GNK<br>VDTYFNYIYHIDLYKFFSS<br>DSNQHKVENFQLNTISSYY<br>LGENKIDLPWTEMVKMYN<br>TRRLDVIKYNVQDCMLPI<br><u>KLFV</u> KL <u>KM</u> ADSVYSQ <u>CIL</u> <u>H</u><br><u>R</u> LCTDDVICNISHLISVACF<br>YAAITNTRINESTGKEEPDP<br>YFFNKNDLSIISGQFKADK<br>AAAGISNLKRKLIPLKNIPK<br>DAINLGPANQTVKYKGGK<br>VLKPRAGIYKNAFSLDFNS<br>LYLTIMIAICACLSNLILCED<br>GNVYLNHNSRAIVKLLK<br>LLSERCKFKKNRDNQSESA<br>FLYDLYDQKQNSVKR <u>TAN</u><br><u>SIY</u> GYGYGIFYKVLANYITRV<br>GRNQLRLAISLIEGLSNDPE<br>ILEKFNLGSITFKVVYGD<br>STFVLPFNYNEISNETDL<br>KQICHTVETRVNNSFTDGY<br>KMAFENLMKVLILLKKKK<br>YCYLNSENKIVYK <u>GWL</u> <u>V</u> <u>K</u><br><u>K</u> DMPVFMRIAFRTAVEQIL<br>RHLDMDKCLQSLQTSFYE<br>YYDEFKSKSLTDYSFSMT<br>YNDNPGKRRKSTDDNEGP<br>SPKRRVITVARHCREILVN<br>KGTDFVPGNGDRIPYLLIDI<br>EGKVTEKAYPLRLFDVPK | FCNTNIKERVLQFYFKVKLNLYS<br>YKQCYDKHIFPSCRNKCISYTTF<br>VAPGVEGNYLNKINVIKIERNK<br>AAPSDNAACLDKFLHNVRVH<br>MQTPFVEGAYMRFKKTQRCQN<br>NYVGGSTTRMFNLQHFNEDEFEL<br>VDEMTLTSGIMPVLSYDIETHS<br>DGHNMSKASVDCIMSIGFVVYK<br>NDEYAKFCFMYHKLPTQIPETY<br>DDDTYVVMFQNEIDMITAFDM<br>IKITNPDVILDFNGDVFDPYILG<br>RLNKTMLLKRYDLPAAPT <u>T</u> <u>K</u><br>LFINKLGNKVDYTYFNYIYHIDL<br>YKFFSSDSNQHKVENFQLNTISS<br>YYLGENKIDLPWTEMVKMYNT<br>RRLDVIKYNVQDCMLPIKLFV<br>KLKMADSVYSQCILHRLCTDDV<br>ICNISHLISVACFYAAITNTRINES<br>TGKEEPDPYFFNKNDLSIISGQFK<br>ADKAAAGISNLKRKLIPLKNIPK<br>DAINLGPANQTVKYKGGKVLKP<br>RAGIYKNAFSLDFNSLYLTIMIAI<br>CACLSNLILCEDGNVYLNHNSR<br>AIVVKKLLKLLSERCKFKKNRD<br>NQSESAFLYDLYDQKQNSVKRT<br>ANSIYGYGYGIFYKVLANYITRVG<br>RNQLRLAISLIEGLSNDPEILEKF<br>NLGSITFKVVYGDSTFVLPF<br>NYNEISNETDTLKQICHTVETRV<br>NNSFTDGYKMAFENLMKVLILL<br>KKKKYCYLNSENKIVYKGLV<br>KKDMPVFMRIAFRTAVEQILRH<br>LDMDKCLQSLQTSFYEYDEFA<br>KSKSLTDYSFSMTYNDNPGKRR<br>KSTDDNEGPSKRRVITVARHCR<br>EILVNKGTDFVPGNGDRIPYLLI<br>DIEGKVTEKAYPLRLFDVPKMRI<br>SWIKHMGILCTFMNELLEIFGDE<br>QDKIAKCFTAIMQKYMQNQL<br>YDRKEPVLVKINQKCSVKRRR<br>DDDDNDDDDDDCSSDSEN<br><u>DTQC</u> ANNYK <u>F</u> CLYK <u>M</u> <u>K</u> <u>K</u> |              |      |



| ORF | Identity | Library screen | SDS-PAGE - MALDI                                                                                                                                                                                                                                                                                                                                                                                                                                                                                    | MUDPIT MS/MS                                                                                                                                                                                                                                                                                                                                          | Western blot | Ref. |
|-----|----------|----------------|-----------------------------------------------------------------------------------------------------------------------------------------------------------------------------------------------------------------------------------------------------------------------------------------------------------------------------------------------------------------------------------------------------------------------------------------------------------------------------------------------------|-------------------------------------------------------------------------------------------------------------------------------------------------------------------------------------------------------------------------------------------------------------------------------------------------------------------------------------------------------|--------------|------|
|     |          |                | <u>SSK</u> YSALETTKIKEMESIAD<br>QAVKSEM <u>SKLNTQLDELN</u><br><u>SLFVK</u> YNRKAQDIFEWKTS<br>MLKRY <u>ETLARTTAASVQP</u><br>NVE<br>‡ SKLNTQLDELNSLFVK<br>sequence obtained by MS/MS                                                                                                                                                                                                                                                                                                                  |                                                                                                                                                                                                                                                                                                                                                       |              |      |
| 67  | lef3     |                |                                                                                                                                                                                                                                                                                                                                                                                                                                                                                                     |                                                                                                                                                                                                                                                                                                                                                       | X            |      |
| 70  | hcf-1    | 1              |                                                                                                                                                                                                                                                                                                                                                                                                                                                                                                     | MDSLANLCLKTLPYKFEPKFLR<br>TKYCDACRYRFLPKFSDEKFCG<br>QCICNICNPNKNIDCPSSYISKIKP<br><u>KKENKEIYITSNK</u> FNKTCKNECN<br>QQSNRRCLISYFTNESCKELNCC<br>WFKNCYMCLEYKKNLYNVNL<br>YTIDGHCPFKAVCFSCIKRITC<br>QVCNQPLLKMYKEKQEERLKM<br>QSLYATLNDVDLKDLDIYDVDN<br>YSRKMLCAQCHIFARCFCTNT<br>MQCFCPRQGYKCECICRRSKYF<br>KNNVLCVKSKAACFNKMKIKR<br>VPKWKHSVDYTFKSIYKLINV |              |      |
| 77  | vlf-1    | 1              | MNGFNVRNENNFNSWKIKI<br>QSAPRFESVFDLATDRQRC<br>TPDEVKNNLSWSKYMFPK<br>PFAPTTLKSYKSRFIKIVYC<br>SVDDVHLEDMSYSLDKEF<br>DSIENQTLIDPQELCRRML<br>ELRSVTKETLQLTINFYTN<br>MMNLPEYKIPRMVMLPRD<br>KELKNIREKEKNLMLKNVI<br>DTILNFINDKIKMLNSDYV<br>HDRGLIRGAIVFCIMLGTG<br>MRINEARQLSVDDLNVLIK<br>RGKLSHTINLKRKRSRNN<br>TLNNIKMKPLELAREIYSR<br><u>NPTILQISK</u> NTSTPFKDFRR<br>LLEESGVEMERPRSNMIRH<br>YLSSNLVNSGVPLQKVAKL<br>MNHESASTKHLYLNKYNIG<br>LDETSSEEENNDDDDAQ<br>HNRNSSGSSGESLLYRNE<br>‡ sequenced by MS/MS |                                                                                                                                                                                                                                                                                                                                                       |              | 5    |
| 89  | p39      |                | <u>MALVPVGMAPRQMRVNR</u><br>CIFASIVSFDACITYKSPCSP                                                                                                                                                                                                                                                                                                                                                                                                                                                   | MALVPVGMAPRQMRVNR<br>CIFASIVSFDACITYKSPCSPDAYHDD                                                                                                                                                                                                                                                                                                      |              | 6    |

| ORF | Identity | Library screen | SDS-PAGE - MALDI                                                                                                                                                                                                                                                                                                                                                         | MUDPIT MS/MS                                                                                                                                                                                                                                                                                                                                                                                                                                                                                                                                                                                                                                                                                    | Western blot | Ref. |
|-----|----------|----------------|--------------------------------------------------------------------------------------------------------------------------------------------------------------------------------------------------------------------------------------------------------------------------------------------------------------------------------------------------------------------------|-------------------------------------------------------------------------------------------------------------------------------------------------------------------------------------------------------------------------------------------------------------------------------------------------------------------------------------------------------------------------------------------------------------------------------------------------------------------------------------------------------------------------------------------------------------------------------------------------------------------------------------------------------------------------------------------------|--------------|------|
|     |          |                | DAYHDDGWFICNNHLIKRF<br>KMSKMVLPIDEDDNQFK<br>MTIARHLVGNKERGIKRLI<br>PSATNYQDVFNLSMMQA<br>EQLIFHLYNNENAVNTICD<br>NLKYTEGFTSNTQRVIHVS<br>YATTKSILDTTNPNTFCSR<br>SRDELRFDDVTNARALRGG<br>AGDQLFNNYSGFLQNLIRR<br>AVAPEYLQIDTEELRFRNC<br>ATCIIDETGLVASVPDGP<br>YNPIRSSDIMRSQPNRLQIR<br>NVLKFEGDTRELDRTL<br>EGYPTVPLFLGYQIINSE<br>NLRNDFIPRANPNATLGG<br>GAVAGPAPGVAGEAGGGI<br>AV | GWFICNNHLIKRFKMSKMVLPIDEDDNQFKMTIARHLVGNKERGIKRLIPSATNYQDVFNLSMMQAEQLIFHLYNNENAVNTICDKYTEGFTSNTQRVIHVSVYATTKSILDTTNPNTFCSRVSRRDELRFDDVTNARALRGGAGDQLFNNYSGFLQNLIRRAVAPEYLQIDTEELRFRNCATCIIDETGLVASVPDGPPEL YNPIRSSDIMRSQPNRLQIRNVLKFEGDTRELDRTLSEGYEPTYPVPLFLGYQIINSENNFLRNDFIPRANPNATLGGGAVAGPAPGVAGEAGGGIAV                                                                                                                                                                                                                                                                                                                                                                                   |              |      |
| 95  | helicase |                |                                                                                                                                                                                                                                                                                                                                                                          | MIDNILQFFLKNVPQDKTYEINN<br>LQDANHLIIRNTRTGTRRLF<br>NNFQQLNTIRNNFNPGCAKHD<br>MGASCEDTEEPAEKHAAQTL<br>HDWVLESNDFCIVKPFILK<br>DIIQKYNFEDFFKSTDPGY<br>VQAGDYYPWPWPKKQAF<br>GWQLFLNIKFGVIEPTIPI<br>LGPVDLFDVDPKCFNLVEL<br>NHDPPQTLFVNGKTKFDD<br>LFIKLMADGTVATCKVNGE<br>LVDKNNFYIRDDINLEEC<br>KHIVNVNLSLRFVFNNDK<br>DVDLSDRSRKPRIVPIIS<br>ADYIQTQINLGLIAIHEN<br>MVKVLAATHERANDPNLLQ<br>QYFEKSKFKNFDFLIYV<br>LWKILTKNENFSYRETD<br>IKLFLELLCESLFACDKE<br>ALNEALKRCEPYKKQEKI<br>VFNACNHWDFDDTKLCV<br>SLGYFGIHYMIYLTQSA<br>KNEILDHDELWAYTYENV<br>MALNLPDIVCKGFFRKL<br>ENVVTGVNLFVNGKHYQ<br>IVKKEDDLFLTKSNKYK<br>LSNIKFNWVYLYLTTHG<br>VYNVFTNSFHSSCPFL<br>LGTLPQTFKKPTDEKYL<br>PEAFNYMLSTSADELSI<br>RTYHIA | X            |      |

| ORF | Identity   | Library screen | SDS-PAGE - MALDI                                                                                                                                                                                                                                                                                                                                           | MUDPIT MS/MS                                                                                                                                                                                                                                                                                                                                                                                                                                                                                                                                                                                                                                                                                                                               | Western blot | Ref. |
|-----|------------|----------------|------------------------------------------------------------------------------------------------------------------------------------------------------------------------------------------------------------------------------------------------------------------------------------------------------------------------------------------------------------|--------------------------------------------------------------------------------------------------------------------------------------------------------------------------------------------------------------------------------------------------------------------------------------------------------------------------------------------------------------------------------------------------------------------------------------------------------------------------------------------------------------------------------------------------------------------------------------------------------------------------------------------------------------------------------------------------------------------------------------------|--------------|------|
|     |            |                |                                                                                                                                                                                                                                                                                                                                                            | KMCRDVKMLKTNTAIVNYMGN<br>CNTCQADMRVALNNLFRDLWN<br>LDDENLITLALYVNKNRVSMDL<br>HNLKCKPCRSTVSGSRPKCKCY<br>KIKINRKALKVCLMADMFGND<br>AELSELIWMLIFTNKTYVSTTLIR<br>TNSEFVNQHGEFFSKEHNKIIQY<br>LYRTIHKIEYVDMLMDKFNDKR<br>LFLTEL RDDVAREPDVQFEESDN<br>ISKFYTHHADALMILKKYNVW<br>WDKILARSTDDLPTWLTRFYM<br>RIIMSKVDLKEYSYNYLKKIVEG<br>YLYFKRFTNFNHANAIMLMHFA<br>ASLAIPVDYGKKAIYMPGEPGSG<br>KSSFFELLDYLVLMHKFDDDNH<br>SGESNKETSDKEVSKLNSQLYTI<br>NELKQCSESYFKKHADSSKSDS<br>KSRKYQGLLKYEANYKMLIVN<br>NKPLYVDDYDDGVQDRFLIVYT<br>NHKFVDSVKFAGSVYEHKSKQ<br>FPIESMYYESLVTPVRLFLSHVL<br>MYRRDPKTGFVVYKTLLSNDP<br>MHKHNLMCLSTNNSPLYALIYIL<br>NIKTVRSATTIGEDKMEEMIGIA<br>VQHFKNFLHPSFVQYNYKKNIN<br>ASSSKSFVNEQVLLQKIKNFKF<br>NNYNKTTNVFYNMTMALNRND<br>LNTSVPNFVC |              |      |
| 100 | p6.9       |                | <u>MVYRRRRR</u> <u>SS</u> <u>TG</u> <u>TY</u> <u>GSTR</u><br><u>RRR</u> <u>SS</u> <u>G</u> <u>Y</u> <u>RR</u> <u>R</u> <u>P</u> <u>G</u> <u>R</u> <u>P</u> <u>R</u> <u>T</u> <u>Y</u> <u>R</u> <u>R</u><br><u>S</u> <u>R</u> <u>S</u> <u>R</u> <u>S</u> <u>T</u> <u>G</u> <u>R</u> <u>R</u> <u>S</u> <u>Y</u> <u>R</u> <u>T</u> <u>R</u> <u>Y</u> <u>Y</u> | MVYRRRRR <u>SS</u> <u>TG</u> <u>TY</u> <u>GSTR</u> <u>RRR</u><br>SSGYRRRPGRPRTYRRSRSRSS<br>GRRSYRTRY                                                                                                                                                                                                                                                                                                                                                                                                                                                                                                                                                                                                                                       |              | 7    |
| 101 | BV/ODV-C42 |                |                                                                                                                                                                                                                                                                                                                                                            | MSAIALYLEINKLRLKIDEPMQL<br>AIWPQLFPLLCDEHQSVQLNTD<br>VLINFMMHVARKSQNTILNNA<br>AIASQYAAGNADVVAAPASAQP<br>TPRPVINLFARANAAPAQPSEE<br>LINMRRYRNAARKLIHHYSLNS<br>TSSTEYKISDVVMTMIFLLRSEK<br>YHSLFKLLETTFDDYTCRPQMT<br>QVQTDLLDAVRSLEMPSTTID<br>LTTVDIMRSSFARCFNSPIMRYA<br>KIVLLQNVALQRDKR <u>TLEELLI</u><br><u>ER</u> GEEKIQLQPQQYINSGTEIPF<br>CDDAEFLNRLKHIDPYPLSRM                                                                                                                                                                                                                                                                                                                                                                            |              | 8    |

| ORF | Identity | Library screen | SDS-PAGE - MALDI                                                                                                                                                                                                                                                                                                                                                                                                                                                                                                                                                                                                                                                                                                                                                                                                                                            | MUDPIT MS/MS                                                                                                                                                                                                                                                                                                                                                                                                                                                                                                                                                                                                                                                                                                                                                                                                                                    | Western blot | Ref. |
|-----|----------|----------------|-------------------------------------------------------------------------------------------------------------------------------------------------------------------------------------------------------------------------------------------------------------------------------------------------------------------------------------------------------------------------------------------------------------------------------------------------------------------------------------------------------------------------------------------------------------------------------------------------------------------------------------------------------------------------------------------------------------------------------------------------------------------------------------------------------------------------------------------------------------|-------------------------------------------------------------------------------------------------------------------------------------------------------------------------------------------------------------------------------------------------------------------------------------------------------------------------------------------------------------------------------------------------------------------------------------------------------------------------------------------------------------------------------------------------------------------------------------------------------------------------------------------------------------------------------------------------------------------------------------------------------------------------------------------------------------------------------------------------|--------------|------|
|     |          |                |                                                                                                                                                                                                                                                                                                                                                                                                                                                                                                                                                                                                                                                                                                                                                                                                                                                             | YYNAANTMFYTTMENYAVSNC<br>KFNIEDYNNIFKVMENIRKHSNK<br>NSNDQDELNIYLGVSNAKRK<br>KY                                                                                                                                                                                                                                                                                                                                                                                                                                                                                                                                                                                                                                                                                                                                                                  |              |      |
| 102 | 13.1 kDa |                | MIASINDTMDTDDNMSQ<br>ARRNRRNRPPARPSAQTQ<br>MAAVDMLQOTINTAASQTA<br><u>ASLLINDITPNKTESLKILST</u><br>QSVGARSLLPEMQANASTI<br>KLNRIETVNVLDFLGSVYD<br>NTIQVIVTE<br>‡ sequence obtained by<br>MS/MS                                                                                                                                                                                                                                                                                                                                                                                                                                                                                                                                                                                                                                                                | MIASINDTMDTDDNMSQARRN<br>RRNRPPARPSAQTQMAAVDML<br><u>QOTINTAASQTAASLLINDITPNKT</u><br><u>ESLKILSTQSVGARSLLPEMQAN</u><br>ASTIKLNRIETVNVLDFLGSVYD<br>NTIQVIVTE                                                                                                                                                                                                                                                                                                                                                                                                                                                                                                                                                                                                                                                                                    |              |      |
| 104 | p87      |                | MNDSNSLLITRLAAQILSRN<br><u>MQTVDVIVDDKTL</u> SLEEKI<br>DTLTSMVLAVNSPPQSPPR<br>VTSSDLAASIKNNSKMVG<br><u>NDFEMRYNVLRMAVVFVK</u><br>HYPKYNETTAGLVAEIES<br>NLLQYQNYVNQGNQYQNE<br>GYDSSLNKAEECYVKIDRL<br><u>FKESIKKIMDDTAFEREQE</u><br><u>AERLRAEQTAANALLERR</u><br><u>AQTSADDVVNRADANIPT</u><br><u>AFSDPLPGPAPRYMYESSE</u><br><u>SDTYMETARRTAEHYTDQ</u><br><u>DKDYNAAYTADEYNSLVK</u><br><u>TVLLRLIEKALATLKNRHLI</u><br><u>TTIDQLKFRDYLSNDADA</u><br>GEFQIFLNQEDCVILKNLSN<br>LASKFFNVRCVADTLEVM<br>LEALRNRIELVQPESDAVR<br><u>RIVIKMQEIKDSSTPLYNI</u><br><u>AMYKSDYDAIKNKNIKTLF</u><br><u>DLYNDR</u> LPINFLDTSATSPV<br>RKTSGKRS <u>AEDDLLPTR</u> SS<br>KRANRPEINVISSEDEQEDD<br>DVEDVDYEKESKRRKLED<br><u>EDFLKLKALEFSKDIVNEK</u><br><u>LQKIIVTDGMKRLYEYCN</u><br><u>CKNSLETLP</u> SAANYGSLK<br><u>RLNLYNLDHIEMNVNFYEL</u><br>LFPLTYLNDNDSKTL<br>QLVNYIFLASNYFQCAKN | MNDSNSLLITRLAAQILSRNMQT<br>VDVIVDDKTLSEEKIDTLTSMV<br>LAVNSPPQSPPRVTSSDLAASIIK<br>NNSKMVGNDFEMRYNVLRMA<br>VVFVKHYPKYNETTAGLVAEI<br>ESNLLQYQNYVNQGNQYQNEGY<br>DSSLNKAEECYVKIDRLFESIK<br>KIMDDTAFEREQEERLRAEQT<br>AANALLERRAQTADDVVNRA<br>DANIPTAFSDPLPGPAPRYMYES<br>SESPTYMETARRTAEHYTDQDK<br>DYNAAYTADEYNSLVKTVLLRL<br>IEKALATLKNRHLITIDQLKFF<br>RDYLSNDADAGEFQIFLNQEDC<br>VILKNLSNLASKFFNVRCVADTL<br>EVMLEALRNRIELVQPESDAVR<br>RIVIKMQEIKDSSTPLYNIAMY<br>KSDYDAIKNKNIKTLFDLYNDR<br>LPINFLDTSATSPVRKTS <u>GKRS</u> A<br><u>EDDLLPTR</u> SSKRANRPEINVISSE<br>DEQEDDDVEDVDYEKESKRRKL<br>EDEDFLKLKALEFSKDIVNEKLQ<br>KIIVTDGMKRLYEYCNCKNSL<br>ETLPSAANYGSLKRLNLYNLD<br>HIEMNVNFYELLFPLTYLNDND<br>NSDKTLHQVNYIFLASNYFQCN<br>CAKNFNYMRETFNVFGPFQID<br>FMVMFVIKFNFLCDMRNFAKLI<br>DELVPNKQPNMRIHSLVVMRDK<br>IVKLAFSNLQFQTFSSKDKSRNT<br>KHLQRLIMLMNANYNVI |              | 9    |

| ORF | Identity | Library screen | SDS-PAGE - MALDI                                                                                                                                                                                                                                                                                                                                                                                                                                                                                                                                                                                                       | MUDPIT MS/MS                                                                                                                                                                                                                                                                                                                                                                                                                                                                                                    | Western blot | Ref. |
|-----|----------|----------------|------------------------------------------------------------------------------------------------------------------------------------------------------------------------------------------------------------------------------------------------------------------------------------------------------------------------------------------------------------------------------------------------------------------------------------------------------------------------------------------------------------------------------------------------------------------------------------------------------------------------|-----------------------------------------------------------------------------------------------------------------------------------------------------------------------------------------------------------------------------------------------------------------------------------------------------------------------------------------------------------------------------------------------------------------------------------------------------------------------------------------------------------------|--------------|------|
|     |          |                | <u>FNYMRETENVFGPFKQIDF</u><br>MVMFVIKFNFLCDMRNFA<br><u>KLIDELVPNKQPNMRIHSV</u><br><u>LVMRDKIVKLAFSNLQFQT</u><br>FSKKD <u>KSRNTKHLQRLIML</u><br>MNANYNVI                                                                                                                                                                                                                                                                                                                                                                                                                                                                |                                                                                                                                                                                                                                                                                                                                                                                                                                                                                                                 |              |      |
| 109 | 44.8 kDa |                | MECPFQIQVCISDR <u>FFAFPH</u><br><u>NLVEQSDVGNKLIENLIV</u><br>YVPTDDRLYIDKKQFPKF<br>NSVLVYR <u>HEHDVNIDSRSP</u><br><u>KKTASATIVYWNPLVPITEI</u><br><u>GAGETR</u> VFSVLLTNNLFYC<br>NTMIVHHENPKCPIEFTYPE<br>TDMQSACSALLKNRNGQS<br>VPPPIKSNLRPIACEIPLSHF<br>KELVESNDFLLCFNLETST<br>MVKILSLKRIFCIFYRKQP<br>ARYVINLPHEEIDNLYNKL<br>NWERTRLMKGDVPSNCA<br><u>TVNRSSLKYIKQAQSLGIP</u><br>DYSQTVVDFVKMFQKIIFP<br>YQLVPNVIIKLNNFDQMVS<br>SAPNKAEPYKKIRLFCKND<br>SIAISSGIVPINMP <u>DFSPPN</u><br><u>TFDYSDYANRTNINFVTQR</u><br><u>VLTDGGFSSGITVTPVKYN</u><br>YYL<br>‡ PDFSPNTFDYSDYANR;<br>TNINFVTQR sequences<br>obtained by MS/MS | MECPFQIQVCISDR <u>FFAFPHNLV</u><br><u>EQSDVGNKLIENLIVYVPTDDD</u><br>RLYIDKKQFPKFNVLVYRHEH<br>DVNIDSRSPKKTASATIVYWNPL<br>VPITEIGAGETRVFSVLLTNNLFY<br>CNTMIVHHENPKCPIEFTYPE<br>MQSACSALLKNRNGQSVPPPIKS<br>NLRPIACEIPLSHFELVESNDFL<br>LCFNLETSTMVKILSLKRIFCIFY<br>YRKQPARYVINLPHEEIDNLYNK<br>LNWERTRLMKGDVPSNCA<br>NRSSLKYIKQAQSLGIPDY <u>SOT</u><br><u>VVDFVKMFQKIIFPYQLVPNVII</u><br><u>KLNNFDQMVSAPNKAEPYKKI</u><br>RLFCKNDSIAISSGIVPINMP <u>DFES</u><br><u>PPNTFDYSDYANRTNINFVTQR</u><br>LTDGGFSSGITVTPVKYNYLL |              |      |
| 114 | 49 kDa   |                |                                                                                                                                                                                                                                                                                                                                                                                                                                                                                                                                                                                                                        | MSKYALLQKMIIN <u>ELFLNDNV</u><br><u>NYATNK</u> LFKSDQANGELHKLLA<br>MLLNYKKSNEAPNIKFDLKNL<br>SFMLENKDKIDIIQFDDIK <u>NYVQ</u><br><u>PAIVNLFESHNR</u> SLNNYSTELST<br>LLEDGNENLVPNITDIDNIKLSH<br>MQLARLLCYTAVVESRNSKPW<br>KAIFNNDTNVLTDSFFNHIMNIL<br>NMIKTNQGLAHNVSVVYHIENI<br>QMNLENKPKRSITETVDKDKF<br>ENKHSDIEVCYVMNNSLHPQDV<br>NSQQTLMCSSFVELNVLFPCLY<br>NDTLPDDQSMVFENLYKFEQTK<br>NKSVSKPSRLGNVMFVNSLIDKP                                                                                                       |              |      |



| ORF | Identity | Library screen | SDS-PAGE - MALDI                                                                                                                                                                                                                                                                                                                                                                                                                                                                                                                                                                                                                                                                                                        | MUDPIT MS/MS                                                                                                                                                                                                                                                                                                                                                                                                                                                                                                                                                                                   | Western blot | Ref. |
|-----|----------|----------------|-------------------------------------------------------------------------------------------------------------------------------------------------------------------------------------------------------------------------------------------------------------------------------------------------------------------------------------------------------------------------------------------------------------------------------------------------------------------------------------------------------------------------------------------------------------------------------------------------------------------------------------------------------------------------------------------------------------------------|------------------------------------------------------------------------------------------------------------------------------------------------------------------------------------------------------------------------------------------------------------------------------------------------------------------------------------------------------------------------------------------------------------------------------------------------------------------------------------------------------------------------------------------------------------------------------------------------|--------------|------|
|     |          |                |                                                                                                                                                                                                                                                                                                                                                                                                                                                                                                                                                                                                                                                                                                                         | ITRETIVNIINSYHNACQNLKRSG<br>HRVVGDYRAYERDYKLAALDFI<br><u>ILMLVTSITHRTLKYNMLNIHEK</u><br>MFQELKTVVCKHNAAKLYDILI<br>NYDINKEPLNFRYNYEVL                                                                                                                                                                                                                                                                                                                                                                                                                                                           |              |      |
| 129 | p24      |                |                                                                                                                                                                                                                                                                                                                                                                                                                                                                                                                                                                                                                                                                                                                         |                                                                                                                                                                                                                                                                                                                                                                                                                                                                                                                                                                                                |              | 10   |
| 132 | 25.1 kDa |                | MSDKTPTKKGGSAMTLR<br>ERGVTKPPKSEKLQQYK<br><u>KAIAAEQTLRRTTADVSSLQ</u><br><u>NPGESAVFQELERLENNAV</u><br><u>VLENEQKRLYPILDTPLDN</u><br>FIVAFVNPTYPMAYFVNTD<br>YKLECARIRSDLLYKKNK<br><u>NEVAINRPKISSFKLQLNNV</u><br>ILDTIETIYDLQNKVLTITA<br><u>PVQDQELRKSIIYFNILNSD</u><br>SWEVPKYMKKLFDEMQL<br>PPVILPLGL                                                                                                                                                                                                                                                                                                                                                                                                                  | MSDKTPTKKGGSAMTLRERG<br>VTKPPKSEKLQQYKKAIAAEQ<br><u>TLR</u> TTADVSSLQNPGESAVFQEL<br>ERLENAVVLENEQKRLYPILDT<br>PLDNFIVAFVNPTYPMAYFVNT<br>DYKLECARIRSDLLYKKNKNE<br>VAINRPKISSFKLQLNNVILDTIE<br>TIEYDLQNKVLTITAPVQDQELR<br>KSIYFNILNSDSWEVPKYMKKL<br>FDEMQLPVPVILPLGL                                                                                                                                                                                                                                                                                                                             |              |      |
| 142 | 49 kDa   |                | MSGGGNLLTLERDHFKYLF<br>LTSYFDLKDNEHVPSEMA<br><u>FIRNYLNCTFDLLDDAVLM</u><br>NYFNYLQSMQLKHLVGST<br><u>STNIFKFKVQFRFVCDRTT</u><br><u>VDILEFDTRMYIKPGTPVY</u><br><u>ATNLFNSPRKMMAFLYA</u><br><u>EFGKVFNKIFVNINNYGC</u><br>VLASAGFLFDDAYVDWN<br>GVRMCAAPRLDNNMHPER<br><u>LYLLGEDMAKHFVDNNILP</u><br><u>PHPSNAKTRKINNSMFMLK</u><br><u>NEFKGLPLFKSKYTVVNST</u><br><u>KIVTRKPNDFNEIDKELNG</u><br>NCPFIFQRDYIFDAQFPP<br>DLLDLLNEYMTKSSIMKIIT<br><u>KFVIEENPAMSGEMSREIIL</u><br><u>DRYSVDNYRKLKLYIKMEITN</u><br><u>QFPVMYDHESSYIFVSKDF</u><br><u>LQLKGTMAFYAPKORILS</u><br><u>ILAVNRLFGATETIDFHPNL</u><br><u>LYYRQSSPPVRLTGDVYVV</u><br><u>DKNEKVFLVKHVESNTVP</u><br><u>AYLLIRGDYESSDLKSLR</u><br><u>DLNPWVQNTLLKLLIPDSV</u><br>Q | MSGGGNLLTLERDHFKYLF<br>YFDLKDNEHVPSEMAFIRNYL<br>NCTFDLLDDAVLMNYFNLYQS<br>MQLKHLVGSTSTNIFKFKVQFR<br>FVCDRTTVDILEFDTRMYIKPGT<br><u>PVYATNLFNSPRKMMAFLYAE</u><br>FGKVFNKIFVNINNYGCVLAG<br>SAGFLFDDAYVDWNGVRMCAA<br>PRLDNNMHPFRLLYLLGEDMAK<br>HFVDNNILPPHPSNAKTRKINNS<br>MFMLKNFYKGLPLFKSKYTVVN<br><u>STKIVTRKPNDFNEIDKELNG</u><br>CPFIFQRDYIFDAQFPPDLLDL<br>LNEYMTKSSIMKIITKFVIEENPA<br>MSGEMSREIILDYSDNYRKL<br>YIKMEITNQFPVMYDHESSYIFV<br><u>SKDFLQLKGTMAFYAPKORIL</u><br><u>SILAVNRLFGATETIDFHPNLLV</u><br>YRQSSPPVRLTGDVYVVDKNEK<br>VFLVKHVSNTVPAYLLIRGDYE<br>SSDLKSLRDLNPWVQNTLLKL<br>LIPDSVQ |              |      |

| ORF                                      | Identity | Library screen | SDS-PAGE - MALDI                                                                                                                                                                                                                                                                                                                                                                                                                                                                                                                   | MUDPIT MS/MS                                                                                                                                                                                                                                                                                                                                                      | Western blot | Ref. |
|------------------------------------------|----------|----------------|------------------------------------------------------------------------------------------------------------------------------------------------------------------------------------------------------------------------------------------------------------------------------------------------------------------------------------------------------------------------------------------------------------------------------------------------------------------------------------------------------------------------------------|-------------------------------------------------------------------------------------------------------------------------------------------------------------------------------------------------------------------------------------------------------------------------------------------------------------------------------------------------------------------|--------------|------|
|                                          |          |                | ‡ ILSILAVNR;<br>TTVDILEFDTR;<br>LYLLGEDMAK;<br>SKYTVVNSTK<br>sequences obtained by MS/MS                                                                                                                                                                                                                                                                                                                                                                                                                                           |                                                                                                                                                                                                                                                                                                                                                                   |              |      |
| 144                                      | ODV-EC27 | 2              |                                                                                                                                                                                                                                                                                                                                                                                                                                                                                                                                    | <u>MKRIKCNKVRTVTEIVNSDEKIQ</u><br><u>KTYELAEFDLKNLSSLESYETLK</u><br>IKLALSKYMAMLSTLEMTQPLL<br>EIFRNKADTRQIAAVVFSTLAFIH<br>NRFHPLVTNFTNKMEFVVTETN<br>DTSIPGEPILFTENEGVLLCSVDR<br>PSIVKMLSREFDTEALVNFENDN<br>CNVRIAKTFGASKRKNTRSSDD<br>YESNKQPNYDMDLSDFSITEVE<br>ATQYLTLTLLTVEHAYLHYIYFK<br>NYGVFEYCKSLTDHSLFTNKLR<br>STMSTKTSNLLLSKFKFTIEDFD<br>KINSNSVTSGFNIYNFNK |              | 11   |
| 147                                      | IE1      |                |                                                                                                                                                                                                                                                                                                                                                                                                                                                                                                                                    |                                                                                                                                                                                                                                                                                                                                                                   | X            |      |
| <b>Identified by using one technique</b> |          |                |                                                                                                                                                                                                                                                                                                                                                                                                                                                                                                                                    |                                                                                                                                                                                                                                                                                                                                                                   |              |      |
| 5                                        | 12.4 kDa |                |                                                                                                                                                                                                                                                                                                                                                                                                                                                                                                                                    | <u>MYRTSRINNA</u> <u>PVVASQHDYDRD</u><br><u>QIKRELSLRNVHDLCTRS</u> <u>GTS</u><br>FDCNKFLRSDDMTPVVTTITPKR<br>TADYK <u>KITEYVGDVKT</u> IKPSNRPL<br>VESGPLVREAAKYGECIV                                                                                                                                                                                               |              |      |
| 14                                       | lef 1    | 2              |                                                                                                                                                                                                                                                                                                                                                                                                                                                                                                                                    |                                                                                                                                                                                                                                                                                                                                                                   |              |      |
| 22                                       | 44 kDa   |                | <u>MYRVLIVFFLVFLYIVYQP</u><br><u>FYQAYLHIGHAQDYNDT</u><br><u>LDDRMDYIESVMRRRH</u> <u>YV</u><br><u>PIEALPAIRFDNLGTL</u> <u>AGD</u><br><u>TIK</u> CMSVPLFVSDIDLPMFD<br>CSQICDNPSAAYFFVNETD<br>VFVNGHRLTVGGYCSTN<br>SLPRNCNRETSVILMSLNQ<br>WTCIAEDPRYYAGTDNMT<br><u>QLAGRQH</u> FDRIMPGQSDR<br>NVLFDRL <u>LLGREVN</u> VTNTFE<br><u>RRS</u> WDELLEDGTRRFEMR<br>CNARDNNNNLMFVNPLNP<br>LECLPNVCTNVSINVHTSVR<br>PVFETGECDCGDEAVTR <u>VT</u><br><u>HIVPGDR</u> TSMCASIIDGLDK<br><u>STASYRYR</u> VECVNLYTSIL<br><u>NYSNNK</u> LLCPSDTFDSNTD |                                                                                                                                                                                                                                                                                                                                                                   |              |      |

| ORF | Identity | Library screen | SDS-PAGE - MALDI                                                                                                                                                                                                                                                                                                                                                                                                                                                                         | MUDPIT MS/MS                                                                                    | Western blot | Ref. |
|-----|----------|----------------|------------------------------------------------------------------------------------------------------------------------------------------------------------------------------------------------------------------------------------------------------------------------------------------------------------------------------------------------------------------------------------------------------------------------------------------------------------------------------------------|-------------------------------------------------------------------------------------------------|--------------|------|
|     |          |                | AAFAFEVPGSYPLSRNGINE<br>PTYRFYLDTR <u>SRVNYNDVR</u><br>GQLS                                                                                                                                                                                                                                                                                                                                                                                                                              |                                                                                                 |              |      |
| 30  | 54.6 kDa | 1              |                                                                                                                                                                                                                                                                                                                                                                                                                                                                                          |                                                                                                 |              |      |
| 39  | p43      |                | MDKRANSRKPFLLFYNEDY<br>YCEKPKRYFHTNKVIFEKL<br>DSYATNINRCRELLTDFFD<br>YCLPKYYRRKNKFTLLFRL<br>LEPVIKQAGASALTTVSND<br>QCRWLEINQFSGWEQRDN<br>QYAHKWLIKVVGADMGO<br>QILFIIKQVTKK <u>FKTCNLGF</u><br><u>HNYYKLFRRCLSILLFKHK</u><br>EVFVQCLQVILKAAMPVK<br>KKGVVKSNYAFAVTNALH<br>YYIVDNPHLLCK <u>DINVAIK</u><br>VRRLLIK <u>HEMLPTEKQIKLS</u><br>FEKCSKGIEVPLYEKLLLN<br>HMMRINDDNLQWPSLINN<br>KKIMEWVANRCFDESNIKIL<br>HVYIGQYYTSSCRRVKKSF<br>FKYNGWNRQGRFCRTEKF<br>CHLVNLQLNKDGSKKLKR<br>VQRKLINCK |                                                                                                 |              |      |
| 58  | 6.8 kDa  |                |                                                                                                                                                                                                                                                                                                                                                                                                                                                                                          | MFSSRKRRVAKRAFNAK <u>SKKFP</u><br><u>IGEVVSTRKRLKQNTNTPPHYDT</u><br>SEDEDEDNYNY                 |              |      |
| 59  | 8.2 kDa  |                |                                                                                                                                                                                                                                                                                                                                                                                                                                                                                          | MYQIPDMLYNEKMPPRAK <u>LFV</u><br><u>ETFTKYHKMNGGDEDIAMHKA</u><br>RKALEEKYVKIDTLQNLGFRAK<br>PPTR |              |      |
| 74  | 30.5 kDa | 1              |                                                                                                                                                                                                                                                                                                                                                                                                                                                                                          |                                                                                                 |              |      |
| 79  | 12.1 kDa | 2              |                                                                                                                                                                                                                                                                                                                                                                                                                                                                                          |                                                                                                 |              |      |
| 86  | PNK/PNL  |                | MLHVSRLLANGGVKNLCD<br>KFKVKIKNYTEHDLMLVNL<br>YESFERDRDHPVVVECRGL<br>ILNSRTYAVVSRSFDRFFNF<br>QELLQNIIGGEDAHHK <u>LFQS</u><br><u>KENEFKYEKIDGSLIKIYKY</u><br>NGEWHASTRGSAFAENLC<br>VSDVTFKRLVLQALQLDEA<br>HNQFQALCNEYLDCASTH<br>MFELTSKHNRIVTVYDEQP<br>TLWYLASRNNETGDYFYC                                                                                                                                                                                                                  |                                                                                                 |              |      |

| ORF | Identity | Library screen | SDS-PAGE - MALDI                                                                                                                                                                                                                                                                                                                                                                                                                                                                                                                                                                                                                         | MUDPIT MS/MS                                                                                                                                                                                                                                                                                                                 | Western blot | Ref. |
|-----|----------|----------------|------------------------------------------------------------------------------------------------------------------------------------------------------------------------------------------------------------------------------------------------------------------------------------------------------------------------------------------------------------------------------------------------------------------------------------------------------------------------------------------------------------------------------------------------------------------------------------------------------------------------------------------|------------------------------------------------------------------------------------------------------------------------------------------------------------------------------------------------------------------------------------------------------------------------------------------------------------------------------|--------------|------|
|     |          |                | SNLPFCKYPKCYEFTSVQE<br>CVEHAAQLKNLEEGFVVY<br>DKNNAPLCKIKSDVYVLM<br>HKNQSRANPTKLAQLVIN<br>GEHDDFLALFPHLKSVIKP<br>YVDARNTFTNESTINIMVS<br>GLTLNQQRFNELVQTLPW<br><u>KCLAYRCRKAQTIDVESEF</u><br>LKLTEPEKIKMIKNIKFVST<br>KQALNNKLAPTIKLPSSKQ<br>LLVLIGISGSGKSTYAKSLK<br>GYTEINRDDVR <u>VKLFLNGD</u><br><u>YTKLNAFYNQSRKCRQTK</u><br><u>EEQITKMCIEQFLKAAKCG</u><br>ANVVVSDTNLNTQSVDM<br>WQKMAATHNYHFLTRLM<br>DVSLETALERNYKRSKDFP<br>LNPETIKKQYKFLKVNNF<br>EYYVPVGDKFPRAVLCDL<br>DGTVALPTNRSFYDFDNRV<br>AQDEARLDVITCVKYLAN<br>CHDAIIVFMSGRSVICEQPT<br>RNWIEKYFDIKSYKLFMRP<br>SDDTCKDYLLKLFNNYI<br>RGKYNVIAVFDDRPCVVR<br>MWQDLKIPTVFVNCRDYL<br>EF |                                                                                                                                                                                                                                                                                                                              |              |      |
| 88  | cg30     |                |                                                                                                                                                                                                                                                                                                                                                                                                                                                                                                                                                                                                                                          | MEFVKLQCNICFSVAEIKNYFLQ<br>PIDRLTIIPVLELDTCKHQLCSMC<br><u>IRKIRKRKKVPCPLCRVESLHEN</u><br><u>VYSVNRNVVDVIKCSASSVAQW</u><br>NKINANFDAASLASVLFKSLLD<br>DAEDNNANADDTMLSEAQAILK<br>KLQVDIAEQTLNIKQQLDLDK<br>LQQTSMQEKLDKIKSDYNNM<br>HKSFKELQLKRITTEKALKSLND<br>DYAKLASKNAKLSENKVLSNK<br>NIELIKHKNLLQNEYTTLQSYKC<br>ITNATITNTVINVD |              |      |
| 92  | p33      |                |                                                                                                                                                                                                                                                                                                                                                                                                                                                                                                                                                                                                                                          | <u>MIPLTPLFSRYKDSYLLYSFRLID</u><br>LLRASKSTHLTKLLSSQATYLYH<br>FACLMKYKDIQKYEVOQLIEWA<br>INASPDMDLQQFRIEFMDKTTTEL<br>NLRSCQPKSFTYFTTTIWDTMHF                                                                                                                                                                                  |              |      |

| ORF | Identity | Library screen | SDS-PAGE - MALDI                                                                                                                                                                                                                                                                                                                                                                                                | MUDPIT MS/MS                                                                                                                                                                                                                                                                                                                                                                                                                                                                                                                      | Western blot | Ref. |
|-----|----------|----------------|-----------------------------------------------------------------------------------------------------------------------------------------------------------------------------------------------------------------------------------------------------------------------------------------------------------------------------------------------------------------------------------------------------------------|-----------------------------------------------------------------------------------------------------------------------------------------------------------------------------------------------------------------------------------------------------------------------------------------------------------------------------------------------------------------------------------------------------------------------------------------------------------------------------------------------------------------------------------|--------------|------|
|     |          |                |                                                                                                                                                                                                                                                                                                                                                                                                                 | LSLIIDDMVYTRDKSSLDVFMQ<br>QLKTMKVLFYNVFFILQCAMCR<br>DHVMNVKGFIIYHIELIEIALDKE<br>KYGTDITFVDSYQQETAGADVA<br>VVSNNMLMKNLMAYVVSMTFH<br>NHINDYKWIQRNKKPPAHYERM<br>TWGEYKLLNLQ                                                                                                                                                                                                                                                                                                                                                          |              |      |
| 114 | 49 kDa   |                |                                                                                                                                                                                                                                                                                                                                                                                                                 | MSKYALLQKMIINELLEFLNDNV<br><u>NYATNKL</u> FSKDQANGELHLLA<br>MLLNYKKSNEAPNIKFDLKNL<br>SFMLENKDKIDIIQFDDIKNYVQ<br><u>PAIVNLFESHNR</u> SLNNYSELST<br>LLEDGNENLVPNITDIDNIKLSH<br>MQLARLLCYTAVVESRNSKPW<br>KAIFNNDTNVLTDSFFNHIMNIL<br>NMIKTNQGLAHNVSVVYHIENI<br>QMNLENKPKPRSIETVTDKDF<br>ENKHSDIEVCYVMNSLHPQDV<br>NSQQLMCSSFVELNVLFPCLY<br>NDTLPDDQSMSVFENLYKFEQTK<br>NKSVSKPSRLGNVMFVNSLIDKP<br>ITRETIVNIINSYHNACQNLKRS<br>HRVVGDYRAYERDYKLAALDFI<br><u>ILMLV</u> TSITHRTLKYNMLNIHEK<br>MFQELKTVVCKHNAAKLYDILI<br>NYDINKEPLNNFRYNYEVL |              |      |
| 133 | alk-exo  |                | MFASLTSEQLLLLKYYKFN<br>NYVKTIELSQAQLAHWRS<br>NKDIQPKPLDRAEILRVEK<br>ATRGQSKNELWTLRLDR<br>NTASASSNSSGNMLQRPAL<br>LFGNAQESHVKETNGIMLD<br>HMREIIESKIMS AVVETVLD<br>CGMFFSPLGLHAASPDAYF<br>SLADGTWIPVEIKCPYNYR<br>DTTVEQMRVELGNGNRKY<br>RVKHTALLVNKKGTPQFE<br>MVKTDAHYKQMQRQMYV<br>MNAPMGFYVVKFKQNLV<br>VVSVPRDETFCKELSTEN<br>NAYVAFAVENSNCARYQC<br>ADKRRLSFKTHSCNHNYSG<br>QEIDAMVDRGIYLDYGH<br>KCAYCDFSSDSRETCDVSL |                                                                                                                                                                                                                                                                                                                                                                                                                                                                                                                                   |              |      |

| ORF | Identity | Library screen | SDS-PAGE - MALDI                                                                                                                          | MUDPIT MS/MS | Western blot | Ref. |
|-----|----------|----------------|-------------------------------------------------------------------------------------------------------------------------------------------|--------------|--------------|------|
|     |          |                | KREHTNCKSFNLKHKNFD<br>NPTYFDYVKRLQSLKSHH<br>FRNDAKTLAYFGYYLTHT<br>GTLKTFCGSGSQNSSPTKHD<br>HLNDCVYYLEIK<br>‡ sequence obtained by<br>MS/MS |              |              |      |

MALDI, matrix-assisted laser ionization desorption; MUDPIT, multidimensional protein identification technology; MS/MS, tandem MS.

1. Pearson, M. N., Russell, R. L., Rohrmann, G. F. & Beaudreau, G. S. (1988) *Virology* **167**, 407-413.
2. Belyavskiy, M., Braunagel, S. C. & Summers, M. D. (1998) *Proc. Natl. Acad. Sci. USA* **95**, 11205-11210.
3. Olszewski, J. & Miller, L. K. (1997) *J. Virol.* **71**, 5040-5050.
4. Braunagel, S. C., Burks, J. K., Rosas-Acosta, G., Harrison, R. L., Ma, H. & Summers, M. D. (1999) *J. Virol.* **73**, 8559-8570.
5. Yang, S. & Miller, L. K. (1998) *Virology* **245**, 99-109.
6. Thiem, S. M. & Miller, L. K. (1989) *J. Virol.* **63**, 2008-2018.
7. Wilson, M. E. & Price, K. H. (1991) *J. Invertebr. Pathol.* **57**, 264-268.
8. Braunagel, S. C., Guidry, P. A., Rosas-Acosta, G., Engelking, L. & Summers, M. D. (2001) *J. Virol.* **75**, 12331-12338.
9. Lu, A. & Carstens, E. B. (1992) *Virology* **190**, 201-209.
10. Wolgamot, G. M., Gross, C. H., Russell, R. L. & Rohrmann, G. F. (1993) *J. Gen. Virol.* **74**, 103-107.
11. Braunagel, S. C., He, H., Ramamurthy, P. & Summers, M. D. (1996) *Virology* **222**, 100-114.
