# Supplementary material
Source: PubMed Central journal article supplement (PMC187845)
Supplement: pnas_100_17_9797__3.pdf [file pnas_100_17_9797__3.pdf]

**Table 5. Envelope proteins**

| ORF | IDENTITY   | LIBRARY SCREEN | SDS- PAGE -MALDI<br>‡ - Sequence information<br>obtained using MS/MS                                                                                                                                                                                                                                                                                                                                                                                                                                                                                                                                                                                                                                                                                                                                                                                                                                                                                                                                                                                                                                                                                                                                                                                                                                                                                                            | MUDPIT<br>MS/MS                                                                                                                                                                                                                                                                                                                                                                                                                                                                                                                                                                                                                                                                                                                                                                                                                                                                                                                                                                                                                                                                                                                                                                                                                          | WESTERN<br>BLOT | REF |
|-----|------------|----------------|---------------------------------------------------------------------------------------------------------------------------------------------------------------------------------------------------------------------------------------------------------------------------------------------------------------------------------------------------------------------------------------------------------------------------------------------------------------------------------------------------------------------------------------------------------------------------------------------------------------------------------------------------------------------------------------------------------------------------------------------------------------------------------------------------------------------------------------------------------------------------------------------------------------------------------------------------------------------------------------------------------------------------------------------------------------------------------------------------------------------------------------------------------------------------------------------------------------------------------------------------------------------------------------------------------------------------------------------------------------------------------|------------------------------------------------------------------------------------------------------------------------------------------------------------------------------------------------------------------------------------------------------------------------------------------------------------------------------------------------------------------------------------------------------------------------------------------------------------------------------------------------------------------------------------------------------------------------------------------------------------------------------------------------------------------------------------------------------------------------------------------------------------------------------------------------------------------------------------------------------------------------------------------------------------------------------------------------------------------------------------------------------------------------------------------------------------------------------------------------------------------------------------------------------------------------------------------------------------------------------------------|-----------------|-----|
| 16  | BV/ODV-E26 |                |                                                                                                                                                                                                                                                                                                                                                                                                                                                                                                                                                                                                                                                                                                                                                                                                                                                                                                                                                                                                                                                                                                                                                                                                                                                                                                                                                                                 |                                                                                                                                                                                                                                                                                                                                                                                                                                                                                                                                                                                                                                                                                                                                                                                                                                                                                                                                                                                                                                                                                                                                                                                                                                          |                 | 1   |
| 23  | f-protein  | 1              |                                                                                                                                                                                                                                                                                                                                                                                                                                                                                                                                                                                                                                                                                                                                                                                                                                                                                                                                                                                                                                                                                                                                                                                                                                                                                                                                                                                 |                                                                                                                                                                                                                                                                                                                                                                                                                                                                                                                                                                                                                                                                                                                                                                                                                                                                                                                                                                                                                                                                                                                                                                                                                                          | X               |     |
| 46  | ODV-E66    | 2              | <p>MSIVLIIVIVVIFLICFLYLSNSN<br/>           NKNDANKNNAFIDLNPLPLN<br/>           ATTATTTTAVATTTTNNNSI<br/>           VAFRQNNIQELQNFERWFKN<br/>           NLSYSFSQKAEKVVPNPNRW<br/>           NDNTVFDNLSPWTSVPDFGT<br/>           VCHTLIGYCVRYNNTSDTLY<br/>           QNPELAYNLINGLRIICSKLPD<br/>           PPPHQQAPWGPVADWYHFTI<br/>           TMEVFMNITIVLNETQHYDE<br/>           AASLTRYWLGLYLPTAVNSM<br/>           GWHRTAGNSMRMGVPYTY<br/>           QILRGYSLAQIRQEQGIQELN<br/>           TIAFPYVTQGNLHVDSIYID<br/>           HIDVRAYGYLINSYFTFAYYT<br/>           YYFGDEVINTVGLTRAIENVG<br/>           SPEGVVPGVMSRNGTLYSN<br/>           VIGNFITYPLAVHSADYSKVL<br/>           TKLSKTYGSVVGVNRLAY<br/>           YESDPTNNIQAPLWTMARRI<br/>           WNRGRRIYNANTVSFESGII<br/>           LQSLNGIMRIPSGTTSTQSERP<br/>           TIGQTAIKTDTAGAILVYAK<br/>           FAEMNNLQFKSCTLFYDHGM<br/>           FQLYYNIGVEPNSLNNTNGRV<br/>           IVLSRDTSVNTNDSLFEAQRIN<br/>           NNSSEGTTFNGVVCHRVPIT<br/>           NINVPSLTVRSPNSSVELVEQII<br/>           SFQTMYTATASACYKLNVEG<br/>           HSDSLRAFRVNSDENIYVNVG<br/>           NGVKALFNYPWVMVKENK<br/>           VSFMSANEDTIPFSVIMNSFT<br/>           SIGEPALQYSPSNCFVYGNF<br/>           KLNNSFDLQFIFEIV<br/>           ‡NITIVLNETQHYDEAASLTK;<br/>           QNNIQELQNFER;<br/>           IPSGTTSTQSERPTIGQTAIK</p> | <p>MSIVLIIVIVVIFLICFLYLSNSN<br/>           KNDANKNNAFIDLNPLPLNATT<br/>           ATTTTAVATTTTNNNSIVAFRQ<br/>           NNIQELQNFERWFKNNLSYSFSQ<br/>           KAEKVVPNPNRWNDNTVFDNL<br/>           SPWTSVPDFGTVCHTLIGYCVR<br/>           YNNTSDTLYQNPELAYNLINGL<br/>           RIICSKLPDPPPHQQAPWGPVAD<br/>           WYHFTITMPEVFMNITIVLNETQ<br/>           HYDEAASLTRYWLGLYLPTAVN<br/>           SMGWHRTAGNSMRMGVPYTY<br/>           QILRGYSLAQIRQEQGIQELNTI<br/>           AFPYVTQGNLHVDSIYIDHIDV<br/>           RAYGYLINSYFTFAYTYFYFGD<br/>           EVINTVGLTRAIENVGSPGVV<br/>           PGVMSRNGTLYSNVIGNFITYPL<br/>           AVHSADYSKVLTKLSKTYGYSV<br/>           VGVNRLAYYESDPTNNIQAPL<br/>           WTMARRIWNRRGRIYNANTV<br/>           SFESGIIQLSLNGIMRIPSGTTSTQ<br/>           SFRPTIGQTAIKTDTAGAILVY<br/>           AKFAEMNNLQFKSCTLFYDHG<br/>           MFQLYYNIGVEPNSLNNTNGRV<br/>           IVLSRDTSVNTNDSLFEAQRIN<br/>           NNSSEGTTFNGVVCHRVPITNIN<br/>           VPSLTVRSPNSSVELVEQIISFQT<br/>           MYTATASACYKLNVEGHSDSLR<br/>           AFRVNSDENIYVNVGNGVKALF<br/>           NYPWVMVKENKVSFMSANED<br/>           TTIPFSVIMNSFTSIGEPALQYSPS<br/>           NCFVYGNFGLNNSFDLQFIFE<br/>           IV</p> |                 | 2   |

| ORF | IDENTITY | LIBRARY SCREEN | SDS- PAGE -MALDI<br>‡ - Sequence information<br>obtained using MS/MS                                                                                                                                                                                                                                                                                                                                                                                                                                                                                                                                                                                                                                                                       | MUDPIT<br>MS/MS                                                                                                                                                                                                                                                                                                                                                                                                                                                                                                                                                                                                       | WESTERN<br>BLOT | REF    |
|-----|----------|----------------|--------------------------------------------------------------------------------------------------------------------------------------------------------------------------------------------------------------------------------------------------------------------------------------------------------------------------------------------------------------------------------------------------------------------------------------------------------------------------------------------------------------------------------------------------------------------------------------------------------------------------------------------------------------------------------------------------------------------------------------------|-----------------------------------------------------------------------------------------------------------------------------------------------------------------------------------------------------------------------------------------------------------------------------------------------------------------------------------------------------------------------------------------------------------------------------------------------------------------------------------------------------------------------------------------------------------------------------------------------------------------------|-----------------|--------|
|     |          |                | sequence obtained by MS/MS                                                                                                                                                                                                                                                                                                                                                                                                                                                                                                                                                                                                                                                                                                                 |                                                                                                                                                                                                                                                                                                                                                                                                                                                                                                                                                                                                                       |                 |        |
| *80 | gp41     | 6              | <p>MTDERG<u>NFYNTPPPLRYPSN</u><br/> PATAIFTSAQTYNAPGYVPPA<br/> TVPTTVATR<u>DNRM</u>DYTSRSN<br/> <u>STNSVAIAPY</u>NKSKEPTLDAG<br/> <u>ESIWY</u>NKCVDFVQKIIRYYRC<br/> NDMSELSPLMILFINTIRDMCI<br/> DTNPISVNVVK<u>RFESEETMIR</u><br/> HLIRLQKELGQSNAEESLSSD<br/> SNIFQPSFVLSLPAYAQ<u>KEY</u><br/> <u>NGGADMLGKDALAEAAKQL</u><br/> SLAVQYMVAEAVTCNIPIPL<br/> FNQQLANNYMTLLLK<u>HATLP</u><br/> <u>PNIQSAVESRR</u>FPHINMINDLI<br/> NAVIDDLFAGGGDYHYVLN<br/> EK<u>NRARVMSL</u>KENVAFLAPL<br/> <u>SASANIENYMAELATR</u>AGKQ<br/> PSM<u>FQ</u>NATFLTSAANAVNSPA<br/> <u>AHLTKSACQESLTELAFQNET</u><br/> <u>LRREFIQINYNKDANAIIAAA</u><br/> <u>APNATRPN</u>TKGRTA<br/> ‡IFNYMAELATR;<br/> FQATFLTSAANAVNSPAH<br/> LTK sequence<br/> obtained by MS/MS</p> | <p>MTDERG<u>NFYNTPPPLRYPSN</u><br/> ATAIFTSAQTYNAPGYVPPATVP<br/> TTVATRDNRM<u>DYTSR</u>SNSTNSV<br/> <u>AIAPY</u>NKSKEPTLDAGESIWYK<br/> CVDFVQKIIRYYRC<u>NDMSEL</u>SPL<br/> <u>MILFINTIRDM</u>CIDTNPISVNVK<br/> RFESEETMIRHLIRLQKELGQSN<br/> AAESLSSDSNIFQPSFVLSLPAY<br/> AQKFYNGGADML<u>GKDALAEAA</u><br/> <u>KQLSLAVQYMVAEAVTCNIPIPL</u><br/> PFNQQLANNYMTLLLK<u>HATLP</u><br/> <u>NIQSAVESRR</u>FPHINMINDLINAV<br/> IDDLFAGGGDYHYVLNEKNRA<br/> RVMSLKENVAFPLASANIFN<br/> YMAELATRAGKQPSM<u>FQ</u>NATFL<br/> <u>TSAANAVNSPAAHLTK</u>SACQES<br/> LTELAFQNETLRREFIQOINYNK<br/> <u>DANAIIAAA</u>PNATRPNTKGR<br/> TA</p> |                 | 3      |
| 83  | p91      | 1              |                                                                                                                                                                                                                                                                                                                                                                                                                                                                                                                                                                                                                                                                                                                                            |                                                                                                                                                                                                                                                                                                                                                                                                                                                                                                                                                                                                                       |                 | 4      |
| 94  | ODV-E25  | 3              | <p>MWGIVLLIVLLILFYLYWTNA<br/> LNFNSL TESSPSLGQSSDSVEL<br/> DENKQLNVKLNNGRVANLR<u>I</u><br/> <u>AHGDNKLSQVYIAEKPLSIDD</u><br/> <u>IVKEGSNKVGTNSVFLGTVYD</u><br/> <u>YGIKSPNAASTSSNVTMTRGA</u><br/> <u>ANEDIKEFKSMEIVEK</u>GVTP<br/> KT<u>VEDNGMLRFEVDNMIVCL</u><br/> IDPNTAPLSEREVRELKSNCT<br/> LVYTR<u>NAAAQVLENNFTV</u><br/> <u>INAEQTAYLKNYSYREMN</u><br/> ‡LSQVYIAEKPLSIDDIVK<br/> sequence obtained by MS/MS</p>                                                                                                                                                                                                                                                                                                                       | <p>MWGIVLLIVLLILFYLYWTNAL<br/> LNFNSL TESSPSLGQSSDSVELDE<br/> NKQLNVKLNNGRVANLR<u>IAHG</u><br/> <u>DNKLSQVYIAEKPLSIDDIVKEG</u><br/> <u>SNKVGTNSVFLGTVYDYGIKSP</u><br/> NAASTSSNVTMTR<u>GAANFEDIK</u>E<br/> FKSMFIVFKGVTPKTVEDNGM<br/> LRFVDNMIVCLIDPNTAPLSER<br/> EVRELKSNCTLVYTRNAAAQ<br/> VLENNFTVINAEQTAYLKNYK<br/> SYREMN</p>                                                                                                                                                                                                                                                                                     |                 | 5<br>6 |
| 138 | p74      |                | MAVLTAVDLTNASRY <u>AIIHMH</u>                                                                                                                                                                                                                                                                                                                                                                                                                                                                                                                                                                                                                                                                                                              |                                                                                                                                                                                                                                                                                                                                                                                                                                                                                                                                                                                                                       |                 | 7      |

| ORF | IDENTITY | LIBRARY<br>SCREEN | SDS- PAGE -MALDI<br>‡ - Sequence information<br>obtained using MS/MS                                                                                                                                                                                                                                                                                                                                                                                                                                                                                                                                                                                                                                                                                                                                                                                                                                                                                                                                                                                                                                                                                                                                                                          | MUDPIT<br>MS/MS | WESTERN<br>BLOT | REF     |
|-----|----------|-------------------|-----------------------------------------------------------------------------------------------------------------------------------------------------------------------------------------------------------------------------------------------------------------------------------------------------------------------------------------------------------------------------------------------------------------------------------------------------------------------------------------------------------------------------------------------------------------------------------------------------------------------------------------------------------------------------------------------------------------------------------------------------------------------------------------------------------------------------------------------------------------------------------------------------------------------------------------------------------------------------------------------------------------------------------------------------------------------------------------------------------------------------------------------------------------------------------------------------------------------------------------------|-----------------|-----------------|---------|
|     |          |                   | <p> <u>R</u>LEFISRWTRFRPHILIDYTLR<br/>           PASSDDDDYYVPPKLADKAAV<br/>           KLAFSKRGCVSMSCYPFHETG<br/>           VVSNTTFFMYMQTSETSVGY<br/>           AQPACYHLDRAAAMREGAET<br/> <u>QVQSAEFR</u>YTLDNKCILVDSL<br/>           SKMYFN<u>SPYLR</u>TEEHTIMGVD<br/>           DVPAFNVRPDPDPLPERFKG<br/>           EFNEAYCRRFGRELFNGGCSF<br/>           RWWESLIGFVLGDTIFVTFKM<br/>           LANNIFSELRDFDYKAPSSILP<br/>           PRPNVDSNAILAQWRSVRDN<br/>           ATDLEFEKLFNKNPTLNDLG<br/>           MIVNGSPVQITYTAETGFTKT<br/> <u>PIAYNYR</u>GENER<u>ARVEHFEALD</u><br/> <u>RSISDQDLES</u>IITSFLEDYALVF<br/>           GIATDIGFDMLMSGFKSMLK<br/>           K<u>INTSLIPAMK</u>HMLLSTTRRV<br/>           TVRMLGETYKAALVHSLNVI<br/>           AIKTLTVTAKALTRIAIQASSI<br/>           VGIVLILLTLADLVLALWDPF<br/>           GYNNMFPREFPDDMSR<u>TFLT</u><br/> <u>AYFESEDNTTSRE</u>IEEFMPEFFS<br/>           EMVETDDDATFESLFHLLDY<br/>           VASLEVNSDGQMLNLEEGDEI<br/>           EDFDESTLVGQALATSSLYTR<br/> <u>MEFMQY</u>TFRQNTLLSMNKEN<br/>           NNFNQIILGLFATNTIVAFTAF<br/>           VIHTELIFFIFFVIFLMITFYII<br/>           KESYEYYKTIDLLF<br/>           ‡ all peptide sequences obtained<br/>           by MS/MS         </p> |                 |                 |         |
| 143 | ODV-E18  |                   | <p> <u>MIYTDPTTGATTSTDAPSTNY</u><br/> <u>LNRLTPNMFL</u>TILAVVVIIALII<br/>           IFVQSSNGNSSGGNVPPNAL<br/>           GGFVNPLNATMR<u>ANPEMNTP</u><br/> <u>QRQML</u> </p>                                                                                                                                                                                                                                                                                                                                                                                                                                                                                                                                                                                                                                                                                                                                                                                                                                                                                                                                                                                                                                                                    |                 |                 | 8       |
| 148 | ODV-E56  | 3                 | <p>           MSFFSNLRAVNKLYPNQASFI<br/> <u>TDNTRLLTSTPAGF</u>TNVLNAP<br/> <u>SVRNIGNNRFOPGYQLSNNQF</u><br/> <u>VSTSDINRITR</u>NNDVPIRIGVF         </p>                                                                                                                                                                                                                                                                                                                                                                                                                                                                                                                                                                                                                                                                                                                                                                                                                                                                                                                                                                                                                                                                                       |                 |                 | 9<br>10 |

| ORF | IDENTITY | LIBRARY<br>SCREEN | SDS- PAGE -MALDI<br>‡ - Sequence information<br>obtained using MS/MS                                                                                                                                                                                                                                                                                                                                                                                                                                               | MUDPIT<br>MS/MS | WESTERN<br>BLOT | REF |
|-----|----------|-------------------|--------------------------------------------------------------------------------------------------------------------------------------------------------------------------------------------------------------------------------------------------------------------------------------------------------------------------------------------------------------------------------------------------------------------------------------------------------------------------------------------------------------------|-----------------|-----------------|-----|
|     |          |                   | <u>QGISDPQINSLSQLRRVDNVP</u><br><u>DFNYHTKQTRSNAVKQNFPE</u><br><u>TNVRTPEGVQNALQONPRLH</u><br><u>SYMQSLKVGGTGILLATGGY</u><br>FLFSAATLVQDIINAINNTGGS<br>YYVQGKDAGEIAEACLLQR<br>TCRQDPNLNQSDVTICPFDPL<br>LPNNPELTNMCQGFNYEVE<br>KTVCRGSDPSADPSPQYVDI<br>SDLPAGQTLMCIEPYSFGDLV<br>GDLGLDWLLGDEGLVGKSSN<br>VSDSVSGKLMPIILLIGAVLFL<br><u>GLIFYFIYRYMMKGGGGGGV</u><br><u>GAATSPTPIVISMQNPTTAP</u><br><u>R</u><br>‡ PDFNYMTK;<br>TPEGVQNALQQNPR;<br>LYPNQASFIYDNTR;<br>FQPGYQLSNNQFVSTSDINR<br>sequence obtained by MS/MS |                 |                 |     |

‡ MS/MS analysis of SDS-PAGE in-gel digestion

- tegument localization # p91 associates with viral envelope and nucleocapsid.

1. Beniya, H., Braunagel, S.C. & Summers, M. D. (1998) *Virology* **240**, 64-75.
2. Hong, T., Braunagel, S. C. & Summers, M. D. (1994) *Virology* **204**, 210-222.
3. Whitford, M. & Faulkner, P. (1992) *J. Virol.* **66**, 4763-4768.
4. Russell, R. K. Q., Funk, C. J. & Rohrmann, G. F. (1997) *Virology* **227**, 142-152.
5. Hong, T., Summers, M. D. & Braunagel, S. C. (1997) *Proc. Natl. Acad. Sci. USA* **94**, 4050-4055.
6. Russell, R. Q. & Rohrmann, G. F. (1993) *Virology* **195**, 532-540.
7. Kuzio, J., Jacques, R. & Faulkner, P. (1989) *Virology* **173**, 759-763.
8. Braunagel, S. C., He, H., Ramamurthy, P. & Summers, M. D. (1996) *Virology* **222**, 100-114.

9. Braunagel, S. C., Elton, D. M., Ma, H. & Summers, M. D. (1996) *Virology* **217**, 97-110.
10. Theilmann, D. A., Chandler, J. K., Stewart, S., Flipsen, H. T. M., Vlak, J. M. & Crooks, N. E. (1996) *Virology* **218**, 148-158.
